# Supplementary material
Source: publisher figshare collection journal article supplement (https://karger.figshare.com/ndownloader/files/17035157)
Supplement: Supplementary file 1 [file 17035157]

Supplementary Table 5. Primers of m-BCR used in the included studies

| No | Article | Description | Sequence reported in study | Primer sequence compared to reference & inverse complement deoxyribonucleic acid (icDNA) of reverse primer (refer to Supplementary Figure 1(b) *BCR* NCBI Reference Sequence & Supplementary Figure 2a/b *ABL1* variant a/b NCBI Reference Sequence) | |
| --- | --- | --- | --- | --- | --- |
| 1 | Bose S 1998[11] | 1st run | Article referred to Cross NCP 1996[35] | BCR | Cross NCP 1996[35]: 5’-CCCCCGGAGTTTTGAGGATTGC-3’ |
| ABL1 | Cross NCP 1996[35]:*(****Comment:*** *same as M-BCR 1st run)* |
| 2nd run | BCR | Cross NCP 1996[35]: 5’-GAACTCGCAACAGTCCTTCGAC-3’ |
| ABL1 | Cross NCP 1996[35]: *(****Comment:*** *same as M-BCR 1st run)* |
| Control | Article referred to Melo JV 1993 |  |  |
| 2 | Uckun FM 1998[12] | 1st run | 5’-TCCGAGGCCACCATCGTGGGCGTCGGC-3’ | BCR | *(****Comment****: Difference from reference was shown in Supplementary Figure 1(b))*  *(****Comment****: Type of transcript was NR, but it was m-BCR from the BCR sequence)* |
| 5’-TGTGATTATAGCCTAAGACCCGGAG-3’ | ABL1 | 5’-CTCCGGGTCTTAGGCTATAATCACA-3’ (icDNA) |
| 2nd run | 5’-CCAACGATGGCGAGGGCGCCT-3’ | BCR |  |
| 5’-CGAGCGGCTTCACTCAGACC-3’ | ABL1 | 5’-GGTCTGAGTGAAGCCGCTCG-3’ (icDNA) |
| Control | 5’-TTCAGCGGCCAGTAGCATCTGACTT-3’  5’-TGTGATTATAGCCTAAGACCCGGAG-3’ | ABL1 | 5’-CTCCGGGTCTTAGGCTATAATCACA-3’ (icDNA) *(****Comment:*** *same as the 1st run)* |
| 3 | Ravetto PF 2003[13] | 1st run | 5’-TTGTCGTGTCCGAGGCCACC-3’ | BCR | 5’-TTGTCGTGTCCGAGGCCACC-3’ |
| 5’-TGTGATTATAGCCTAAGACCCGGAG-3’ | ABL1 | *(****Comment:*** *same as M-BCR 1st run)* |
| 2nd run | 5’-CAAGACCGGGCAGATCTGGCCC-3’ | BCR | 5’-CAAGACCGGGCAGATCTGGCCC-3’ |
| 5’-TCCACTGGCCACAAAATCATACAGT-3’ | ABL1 | *(****Comment:*** *same as M-BCR 2nd run)* |
| Control (β actin) NR (Sequence of probe was also reported) | | | |
| 4 | Song J 2011[16] | 1st run | Article referred to Maurer J 1991[24] & Weisser M 2004[43]. But Weisser M 2004[43] did not mention the nucleotide sequence. | BCR | Maurer J 1991[24]: 5’-ACCATGGTGGGCGTCCGCAAGA-3’ *(****Comment****: Difference from reference was shown in Supplementary Figure 1(b))*  5’-ATGGCGAGGGCGCCTTCCAT-3’ |
| ABL1 | Maurer J 1991[24]: *(****Comment:*** *same as M-BCR 1st run)* |
| 2nd run | BCR | Maurer J 1991[24]: 5’-ATGGCGAGGGCGCCTTCCAT-3’ |
| ABL1 | Maurer J 1991[24]: 5’-ATCTCCAGTGGCCAGAAAATCATACA-3’ *(****Comment****: same as one of the primers used M-BCR 2nd run)* |
| Control | ABL1 | Maurer J 1991[24]: *(****Comment:*** *same as M-BCR control)* |
| 5 | Zuna J 2011[17] | *(****Comments:*** *this paper is Correspondence to Editor. No information on the PCR technique can be extracted except for information on precautionary measures taken in their study.)* | | | |
| 6 | Ismail SI 2014[19] | 1st run | Article referred to Cross NC 1994[34] & Nogva HK 1998[39] with minor modifications. | BCR | Cross NC 1994[34] & Nogva HK 1998[39]: 5'-ACCGCATGTTCCGGGACAAAAG-3' |
| ABL1 | Cross NC 1994[34]: *(****Comment:*** *same as M-BCR 1st run)* |
| 2nd run | BCR | Nogva HK 1998[39]: 5’-ATGGAGACGCAGAAG-3’ *(****Comment****: Difference from reference was shown in Supplementary Figure 1(b))* |
| ABL1 | Nogva HK 1998[39]: 5'-GGCCACAAAATCATAC-3'  5’-GTATGATTTTGTGGCC-3’ (icDNA) |
| Control | ABL1 | Nogva HK 1998[39]: *(****Comment:*** *same as M-BCR control)* |
| 7 | Kosik P 2017[22] |  | Article referred to Gabert J 2003. But Gabert J 2003[40] reported primer for real-time qPCR, not nested PCR. | BCR | Gabert J 2003[40]: 5’-CTGGCCCAACGATGGCGA-3’ |
| ABL1 | Gabert J 2003[40]: 5’-CACTCAGACCCTGAGGCTCAA-3’  5’-TTGAGCCTCAGGGTCTGAGTG-3’ (icDNA) |
| Control | ABL1 | Gabert J 2003[40] did not report the sequence used but referred to Beillard E 2003[44]. |

NCBI, National Center for Biotechnology Information; PCR, polymerase chain reaction; qPCR, quantitative polymerase chain reaction
